# Supplementary material for: Why do general circulation models overestimate the aerosol cloud lifetime effect? A case study comparing CAM5 and a CRM
Source: Copernicus journal article supplement (doi:10.5194/acp-17-21-2017), 2017-01-02
Supplement: Supplementary file 1 [file acp-17-21-2017-supplement.pdf]

Supplement of Atmos. Chem. Phys., 17, 21–29, 2017  
<http://www.atmos-chem-phys.net/17/21/2017/>  
doi:10.5194/acp-17-21-2017-supplement  
© Author(s) 2017. CC Attribution 3.0 License.

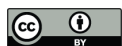

Atmospheric  
Chemistry  
and Physics  
Open Access  
EGU

*Supplement of*

## **Why do general circulation models overestimate the aerosol cloud lifetime effect? A case study comparing CAM5 and a CRM**

**Cheng Zhou and Joyce E. Penner**

*Correspondence to:* Cheng Zhou (zhouc@umich.edu)

The copyright of individual parts of the supplement might differ from the CC-BY 3.0 licence.

Contents of this file:

- Figures S1,S2,S3,S4

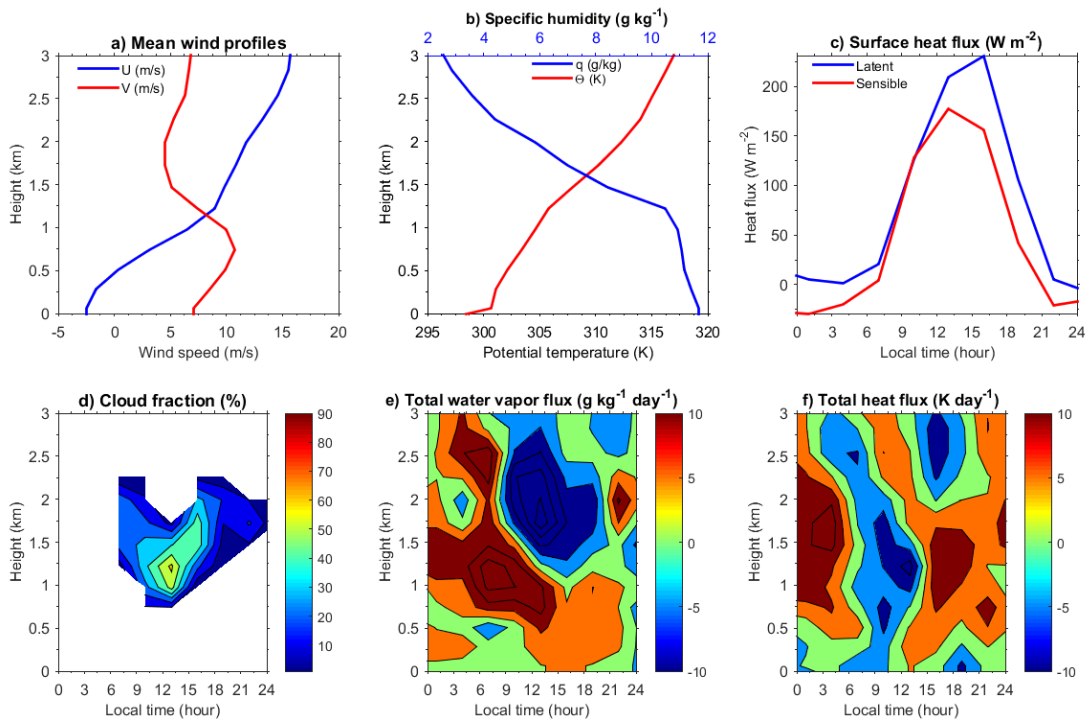

**Figure S1.** (a) Mean observed wind profiles from 10:00-19:00 (local time) on May 27<sup>th</sup>, 2011. (b) Mean observed potential temperature and specific humidity profiles from 10:00-19:00 (local time) on May 27<sup>th</sup>, 2011. (c) Observed surface latent and sensible heat fluxes. (d) Observed cloud fractions. (g) Total advected (horizontal+vertical) water vapor flux and (f) heat flux from the objective variational analysis (Xie *et al.* 2014).

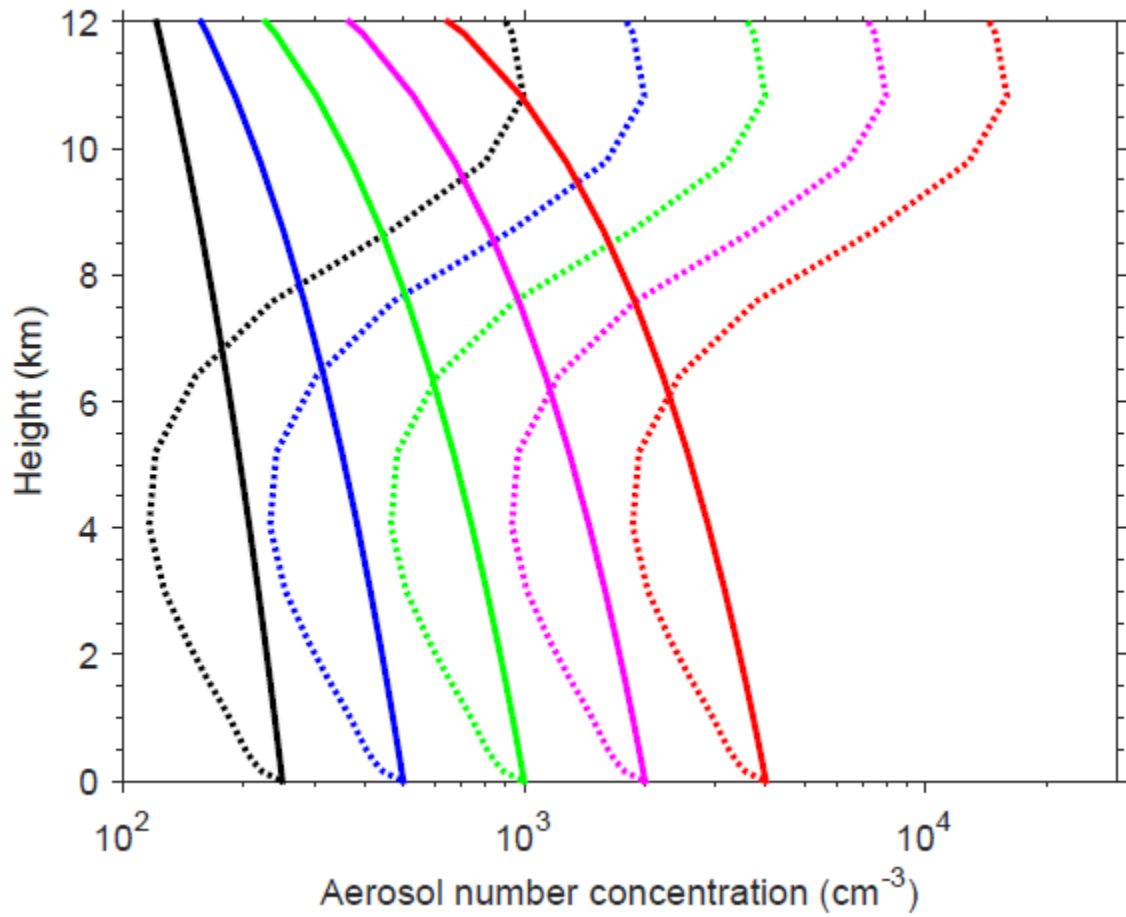

**Figure S2.** Profiles of aerosol number concentration used in the CRM (solid) and CAM (dotted) with five different surface number concentrations (250 cm<sup>-3</sup>, 500 cm<sup>-3</sup>, 1000 cm<sup>-3</sup>, 2000 cm<sup>-3</sup> and 4000 cm<sup>-3</sup>).

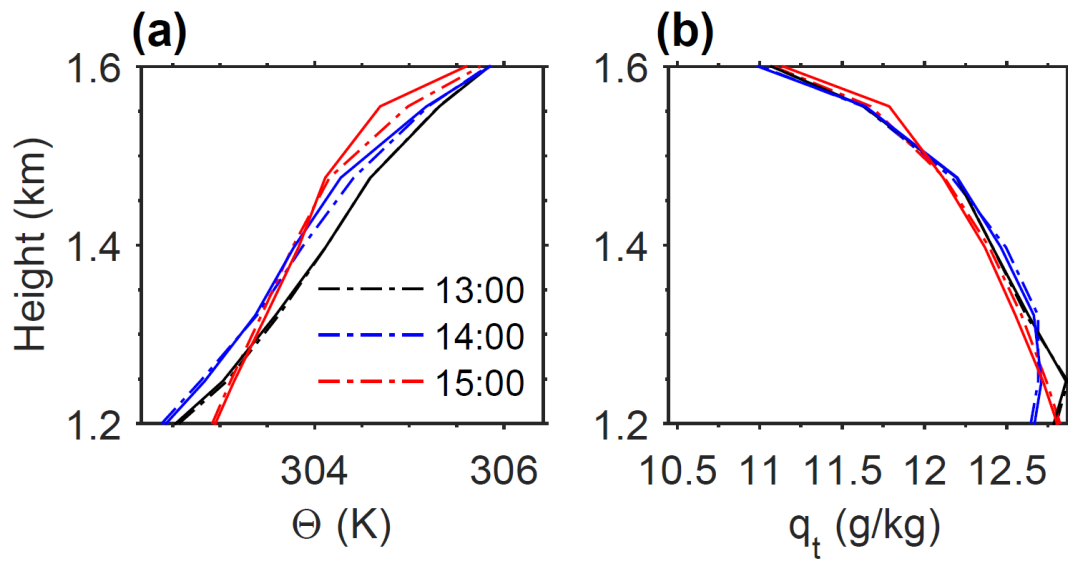

**Figure S3.** An enlarged portion of Fig 2a and 2b showing the (a) domain averaged potential temperatures ( $\theta$ ) and (b) total water specific humidity ( $q_t$ ).

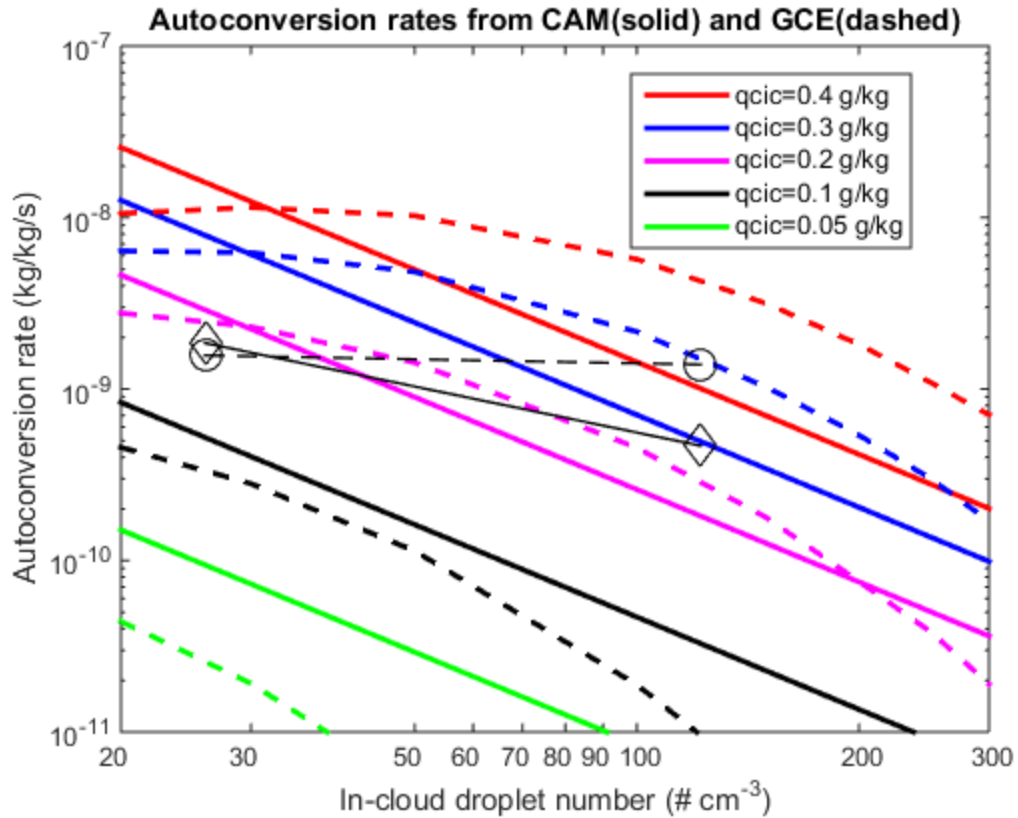

**Figure S4.** Autoconversion rates from the Khairoutdinov and Kogan [2000] scheme used in CAM (solid curves) and from the stochastic collection equation solutions used in GCE (dashed curves) as functions of in-cloud cloud mass mixing ratio and number mixing ratio. An air density of 1.0 kg/m<sup>3</sup> is used. The two pairs of diamond and circle points are autoconversion rates from the two different schemes (diamond: CAM, circle: GCE) using simulated in-cloud droplet number/mass mixing ratios ([26 cm<sup>-3</sup>, 0.167 g/kg] and [122 cm<sup>-3</sup>, 0.293 g/kg]) which are extracted from the center layer of clouds at the 11:30 hour from the two CAM cases with surface aerosol number equal to 250 cm<sup>-3</sup> and 1000 cm<sup>-3</sup>, respectively.

**References are listed in the manuscript.**
